# Supplementary material for: A PANI-Fe3O4@ZnO nanocomposite: a magnetically separable and applicable catalyst for the synthesis of chromeno-pyrido[d]pyrimidine derivatives
Source: Royal Society of Chemistry journal article supplement (doi:10.1039/d0ra01978j), 2020-01-01

### Electronic Supplementary Information (ESI)

IR of 4a

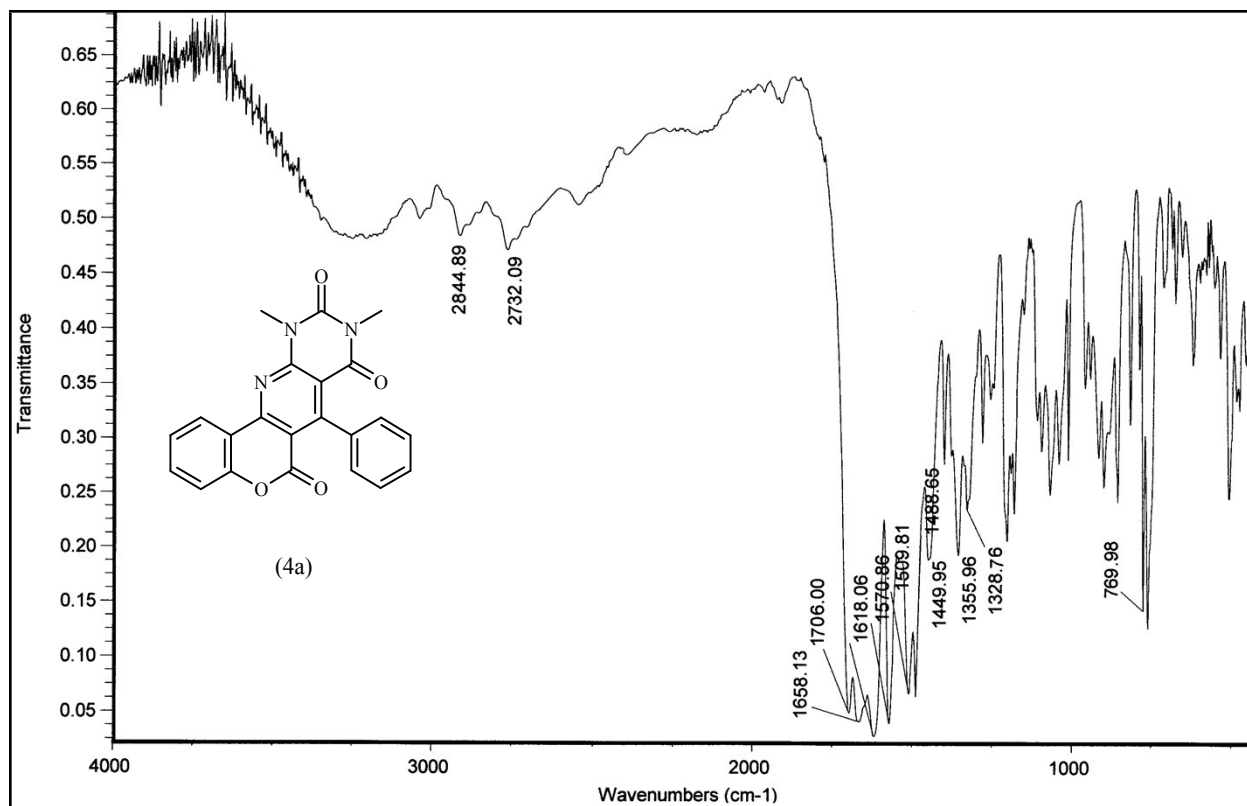

# <sup>1</sup>H-NMR of 4a

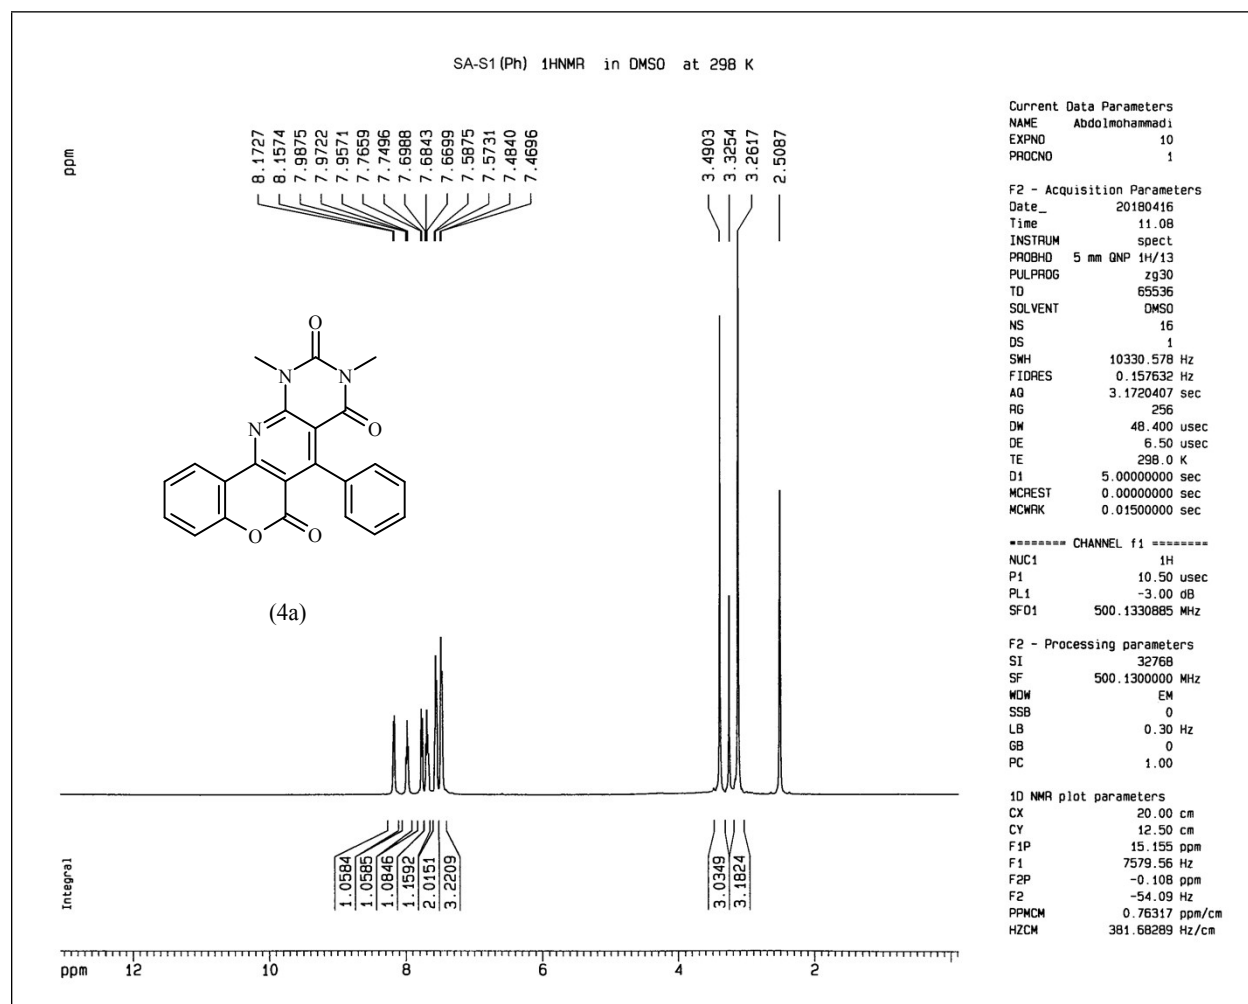

# <sup>13</sup>C-NMR of 4a

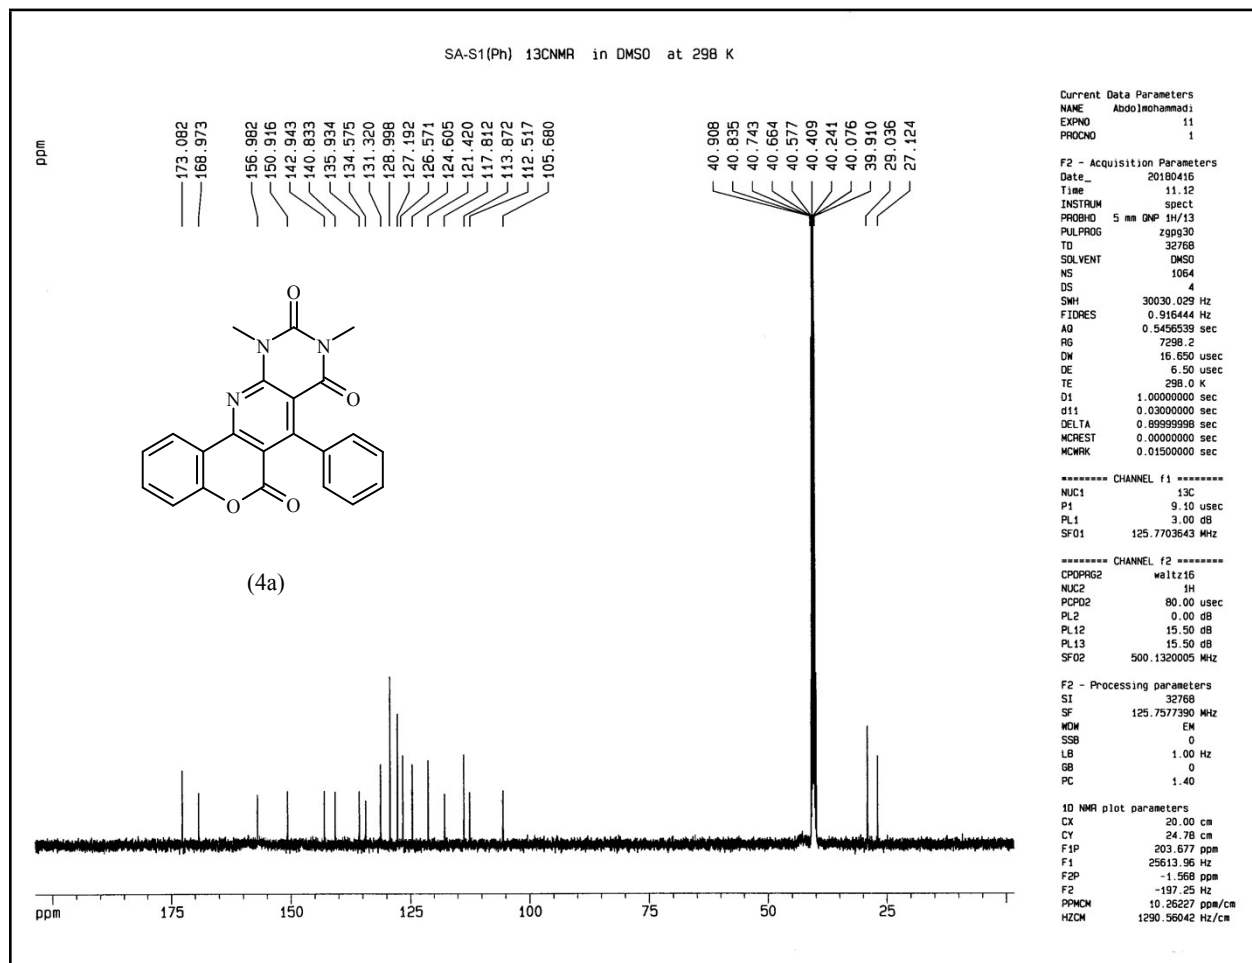

IR of 4b

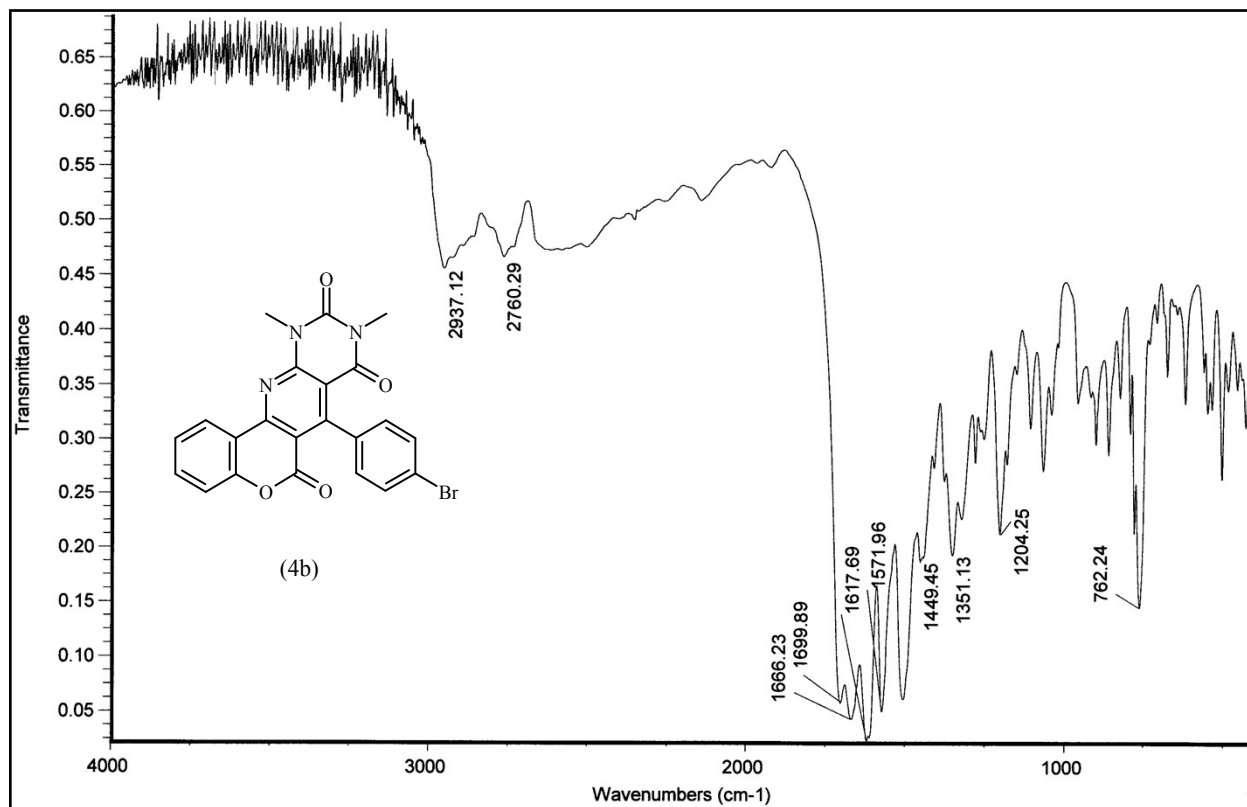

<sup>1</sup>H-NMR of 4b

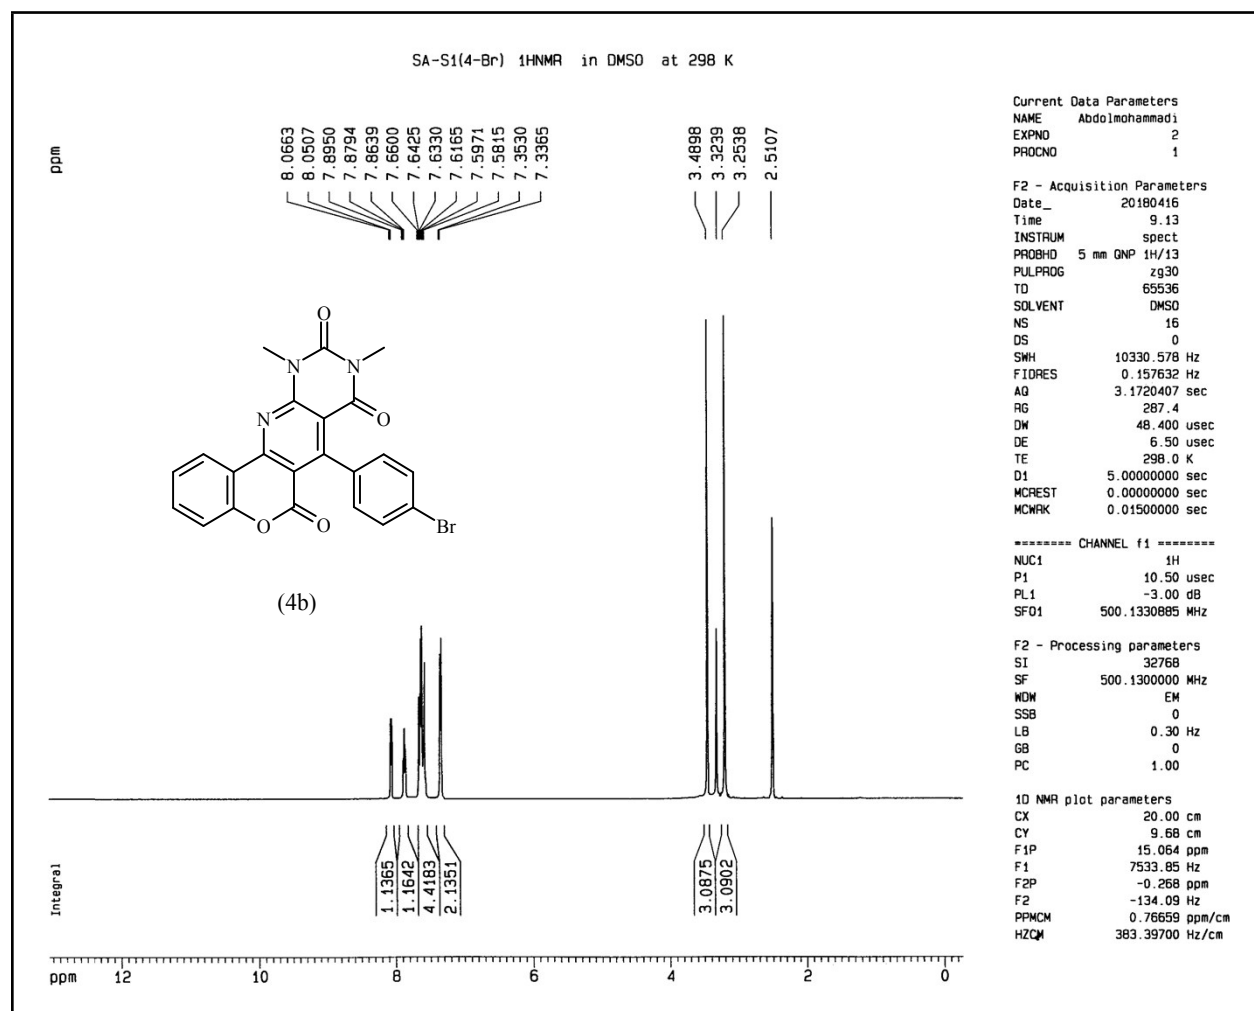

<sup>13</sup>C-NMR of 4b

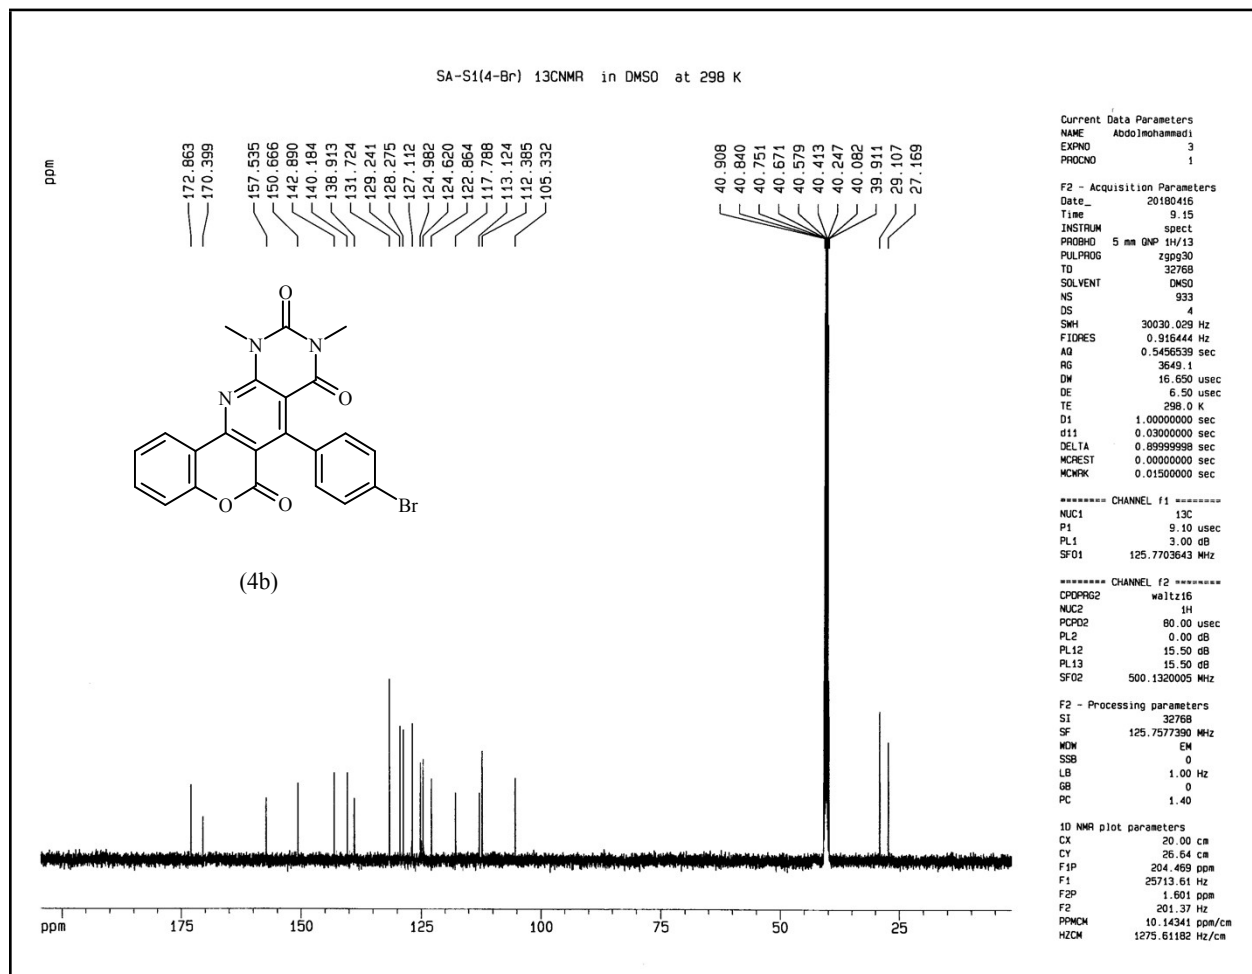

IR of 4c

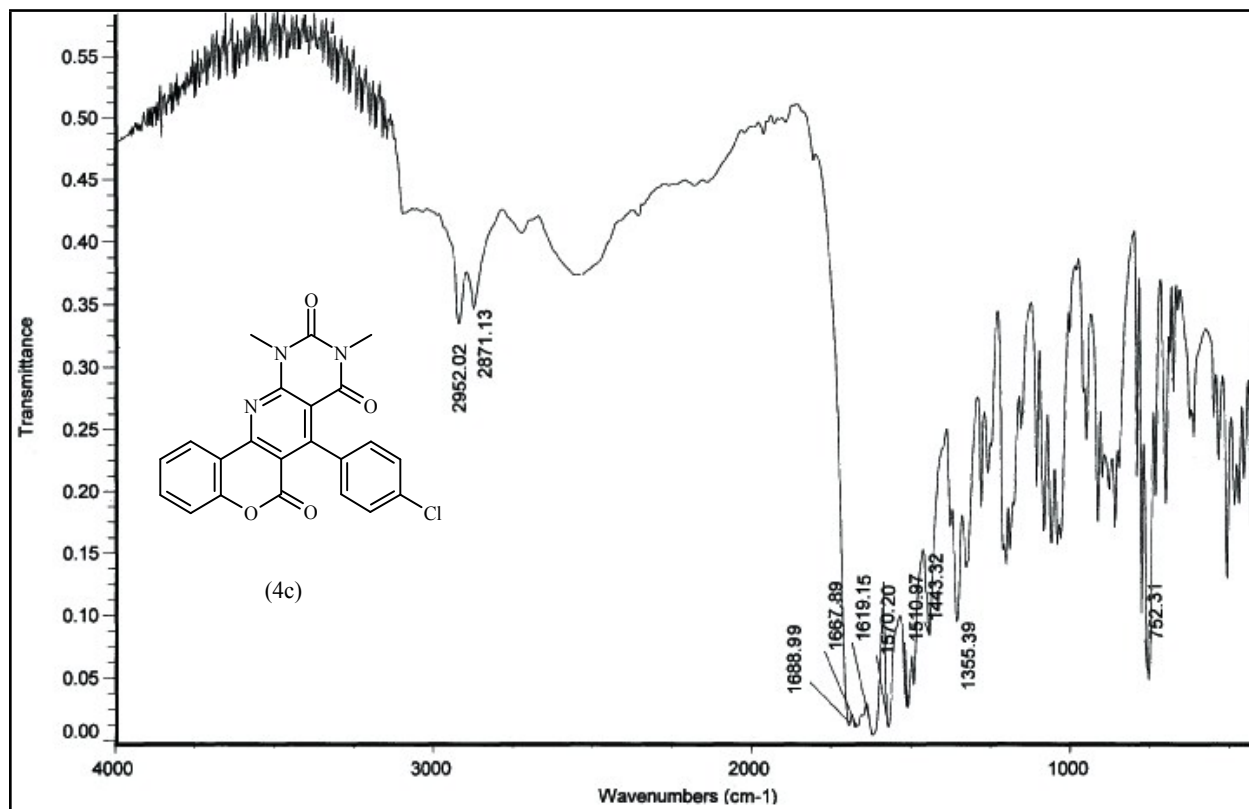

<sup>1</sup>H-NMR of 4c

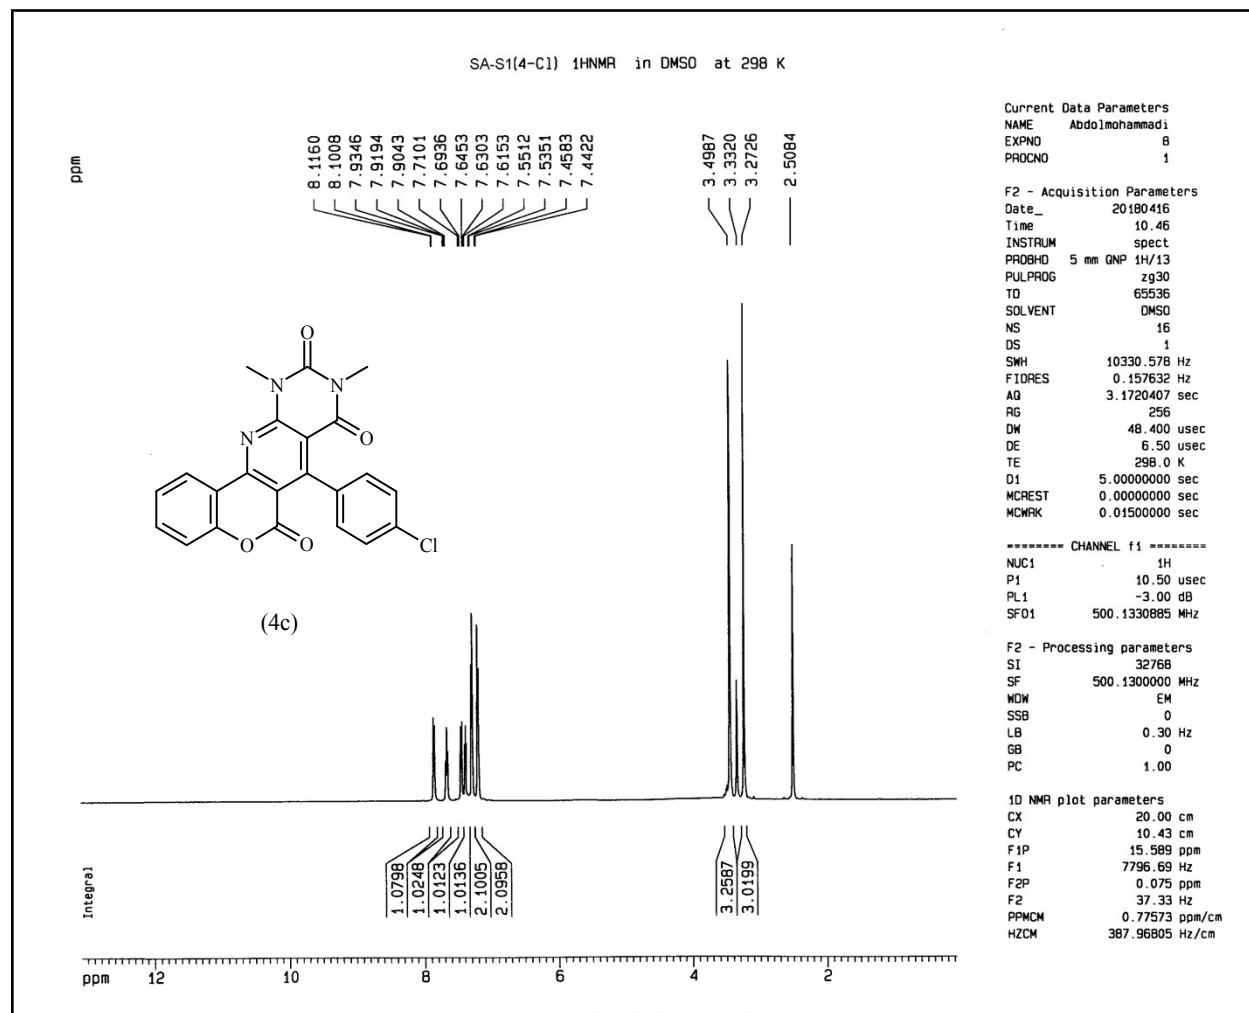



<sup>13</sup>C-NMR of 4c

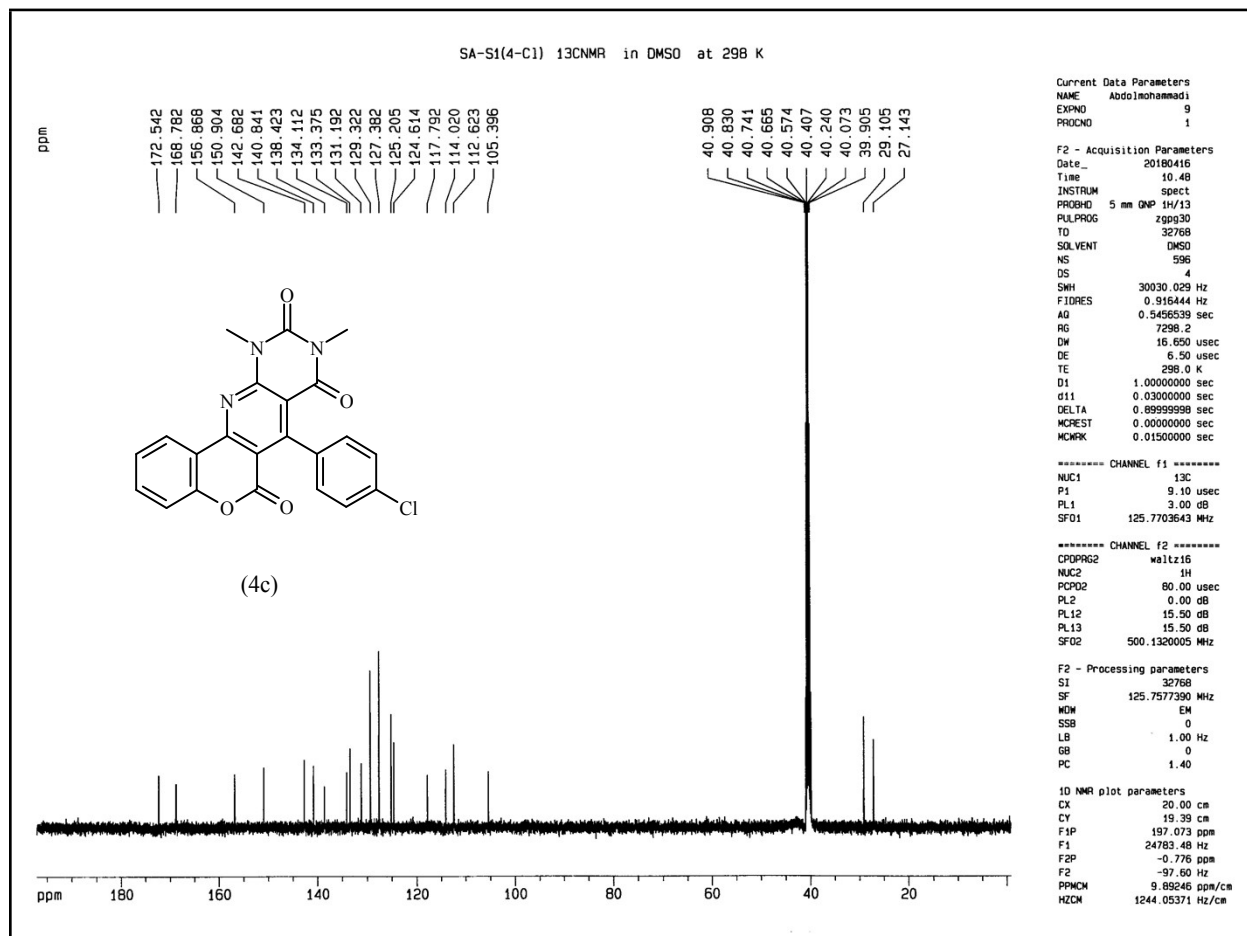

# IR of 4d

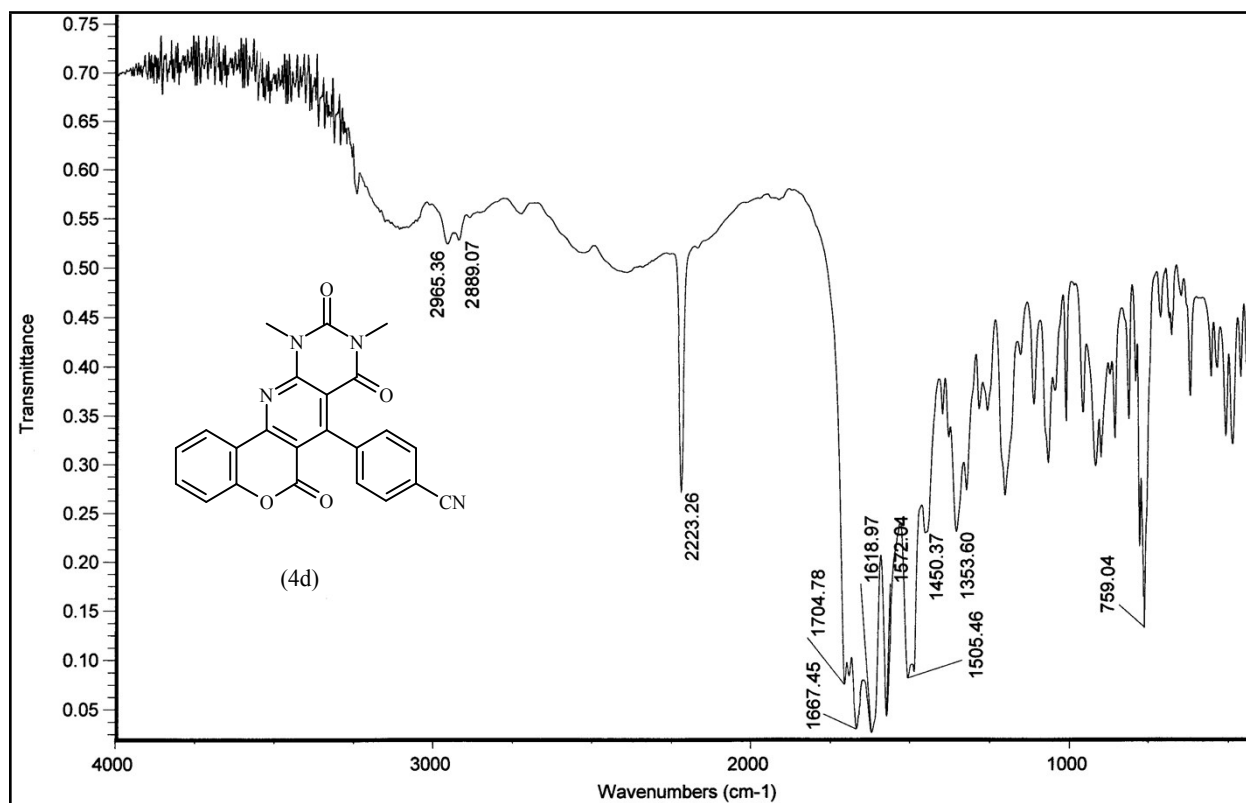

<sup>1</sup>H-NMR of 4d

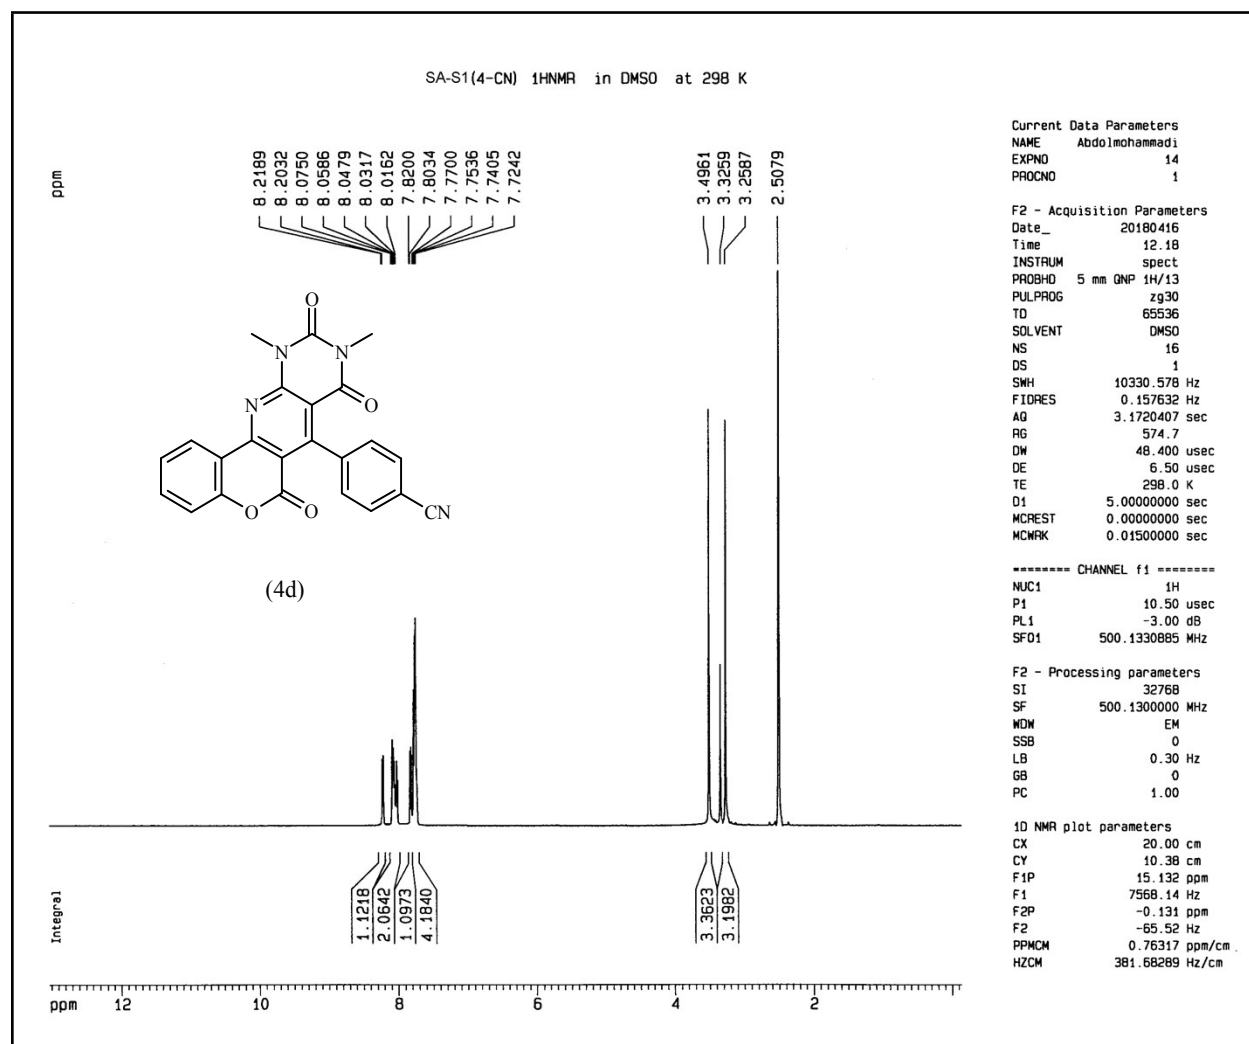

# <sup>13</sup>C-NMR of 4d

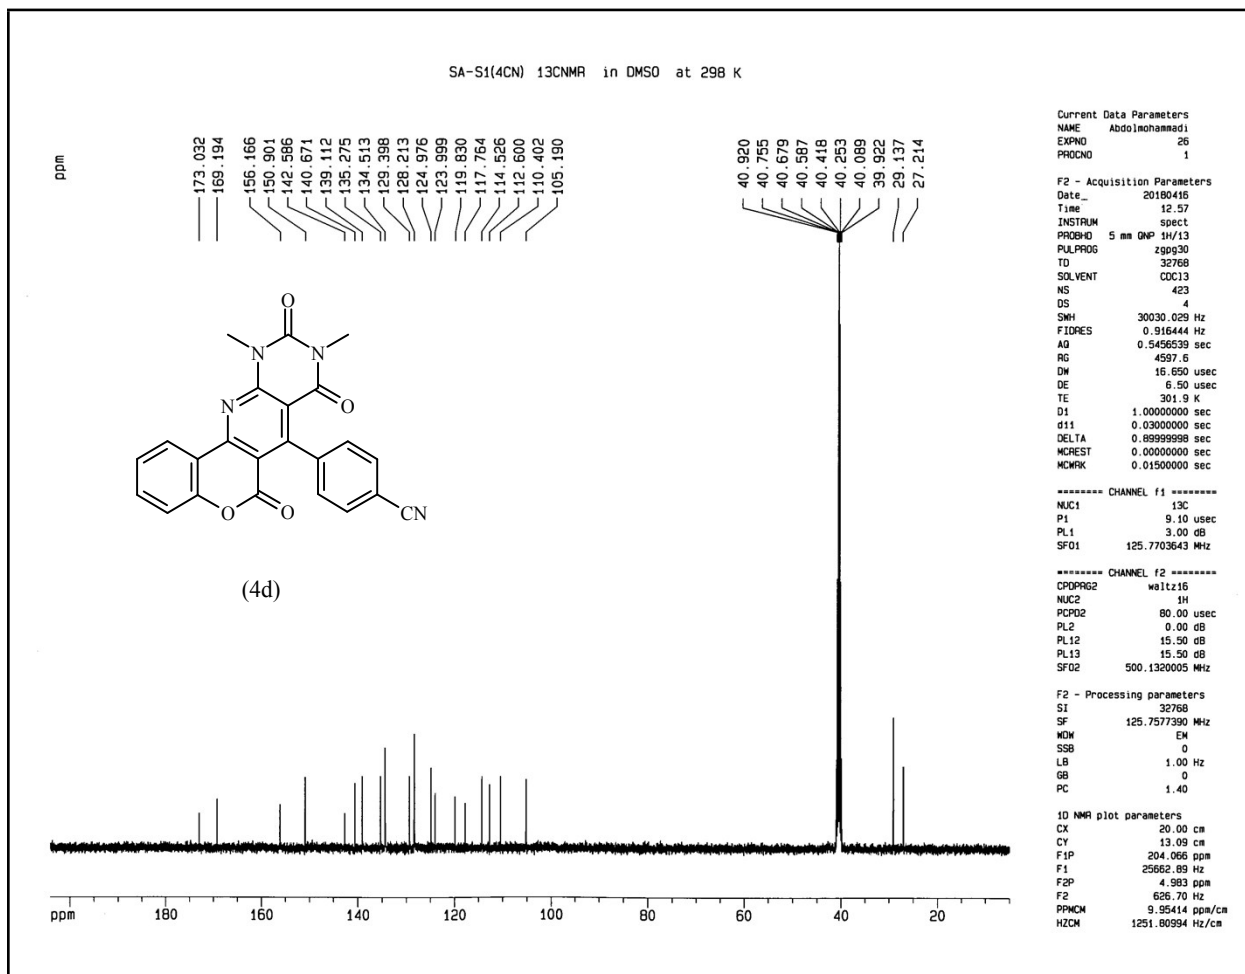

IR of 4e

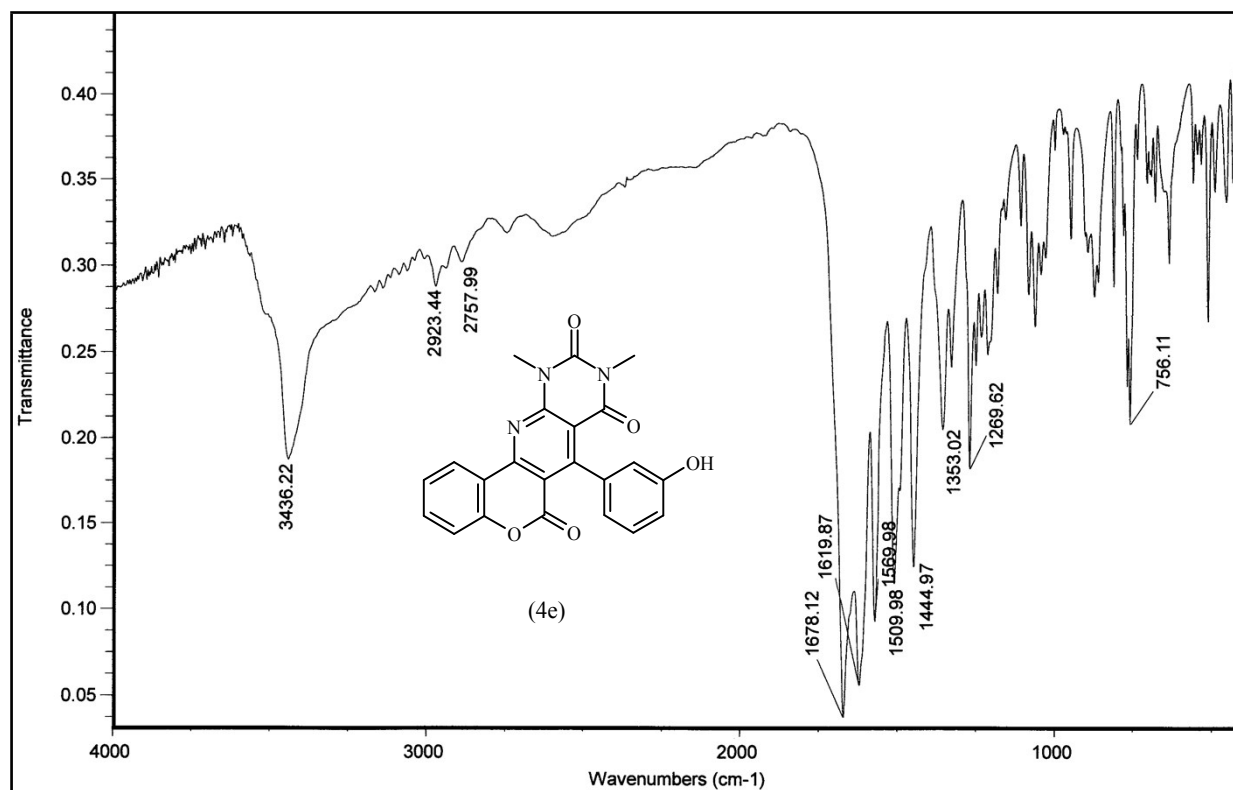

<sup>1</sup>H-NMR of 4e

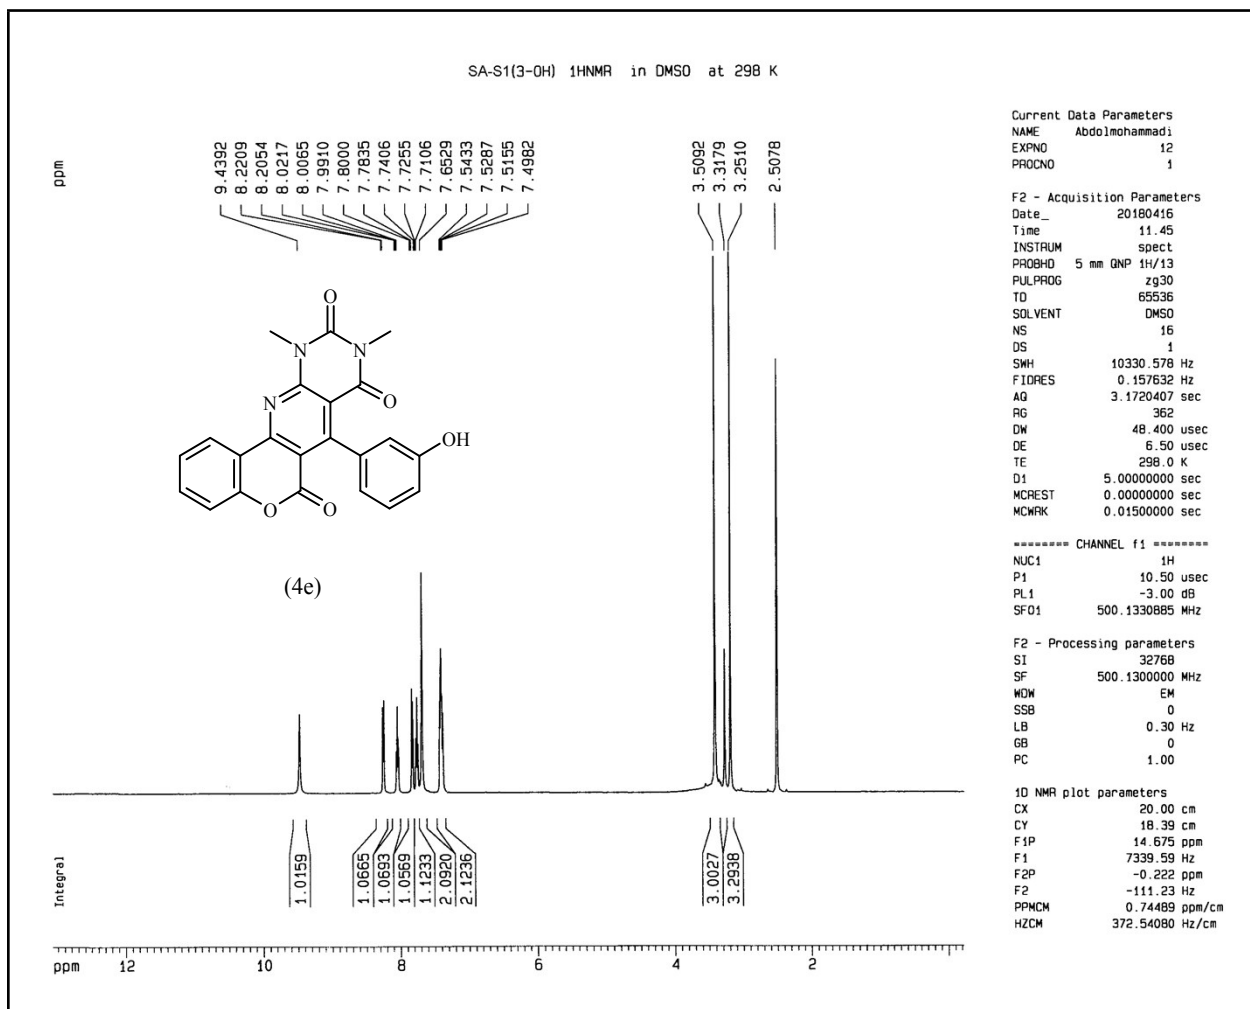

# <sup>13</sup>C-NMR of 4e

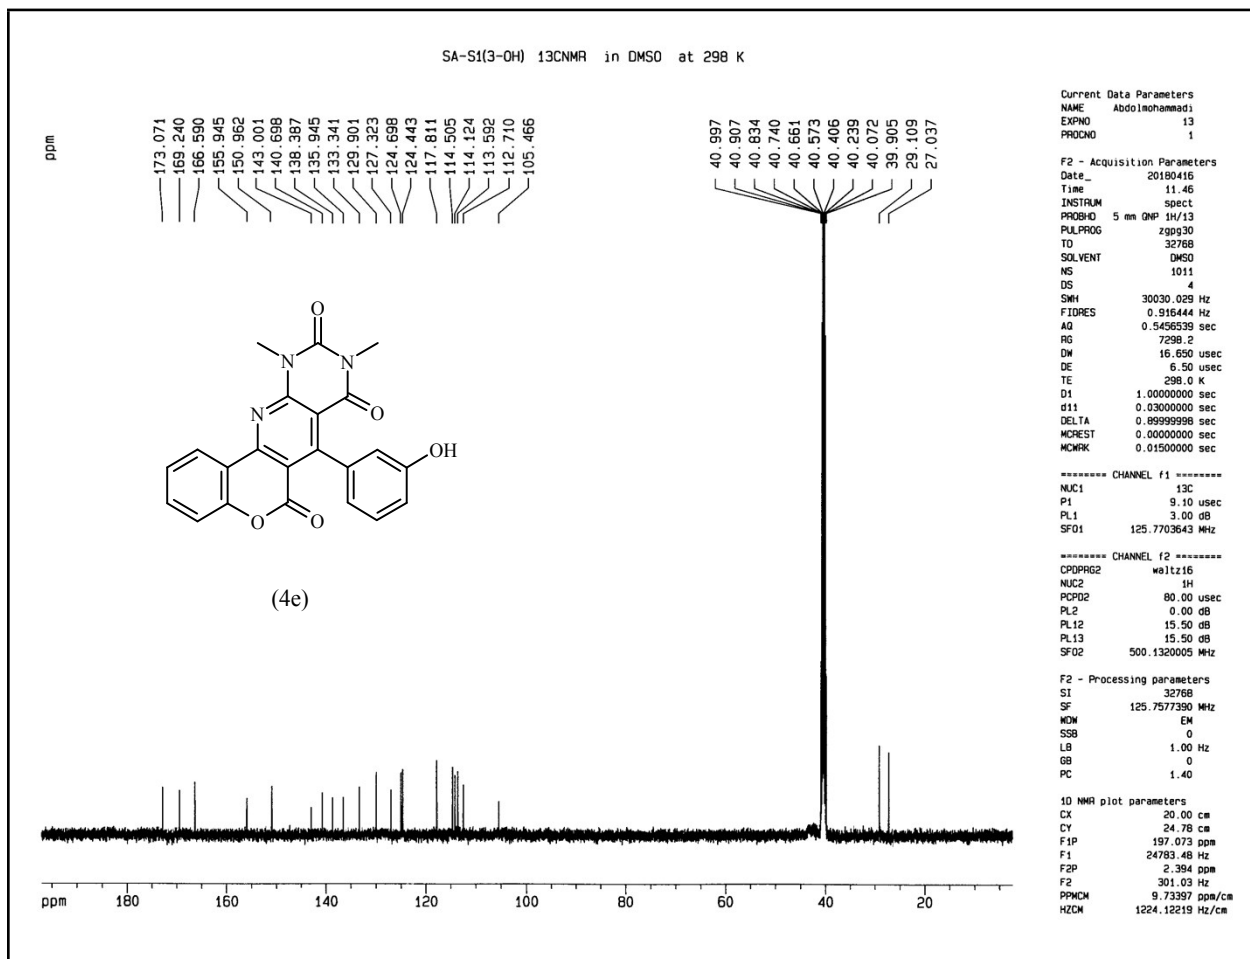

IR of 4f

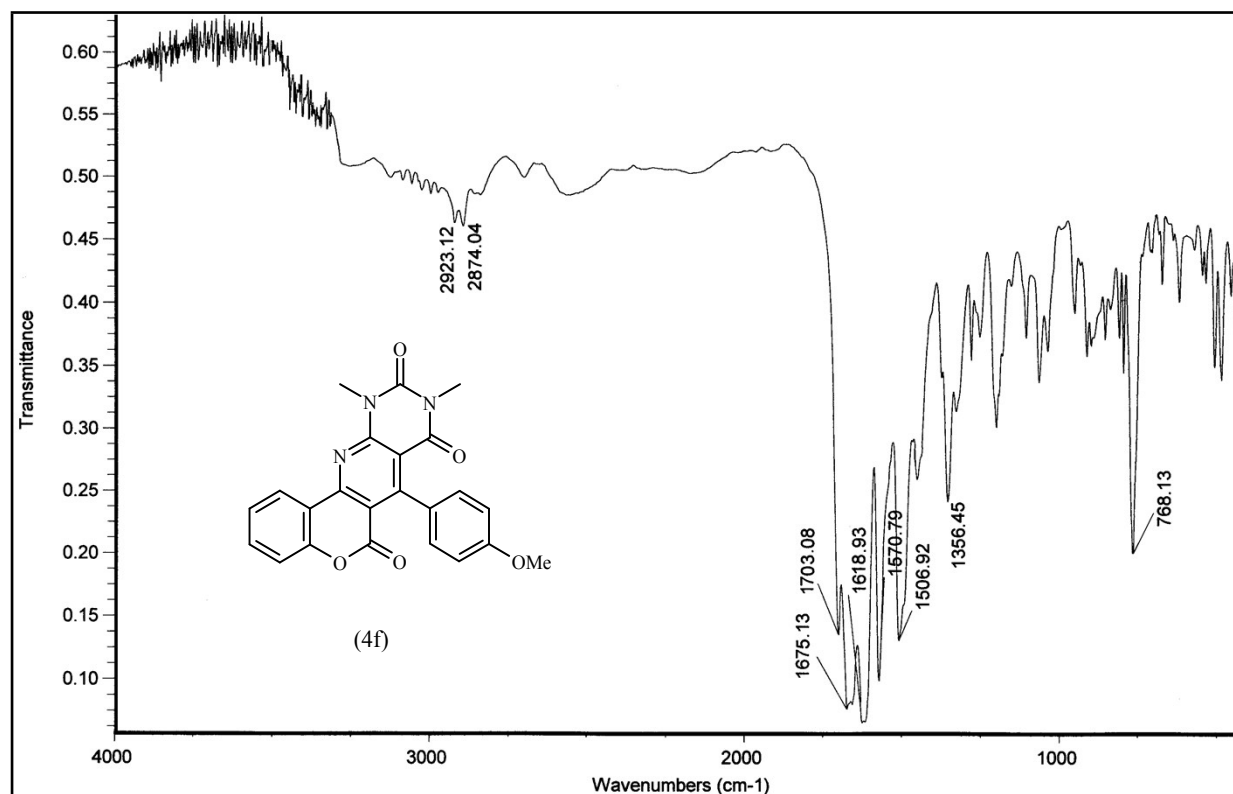



# <sup>1</sup>H-NMR of 4f

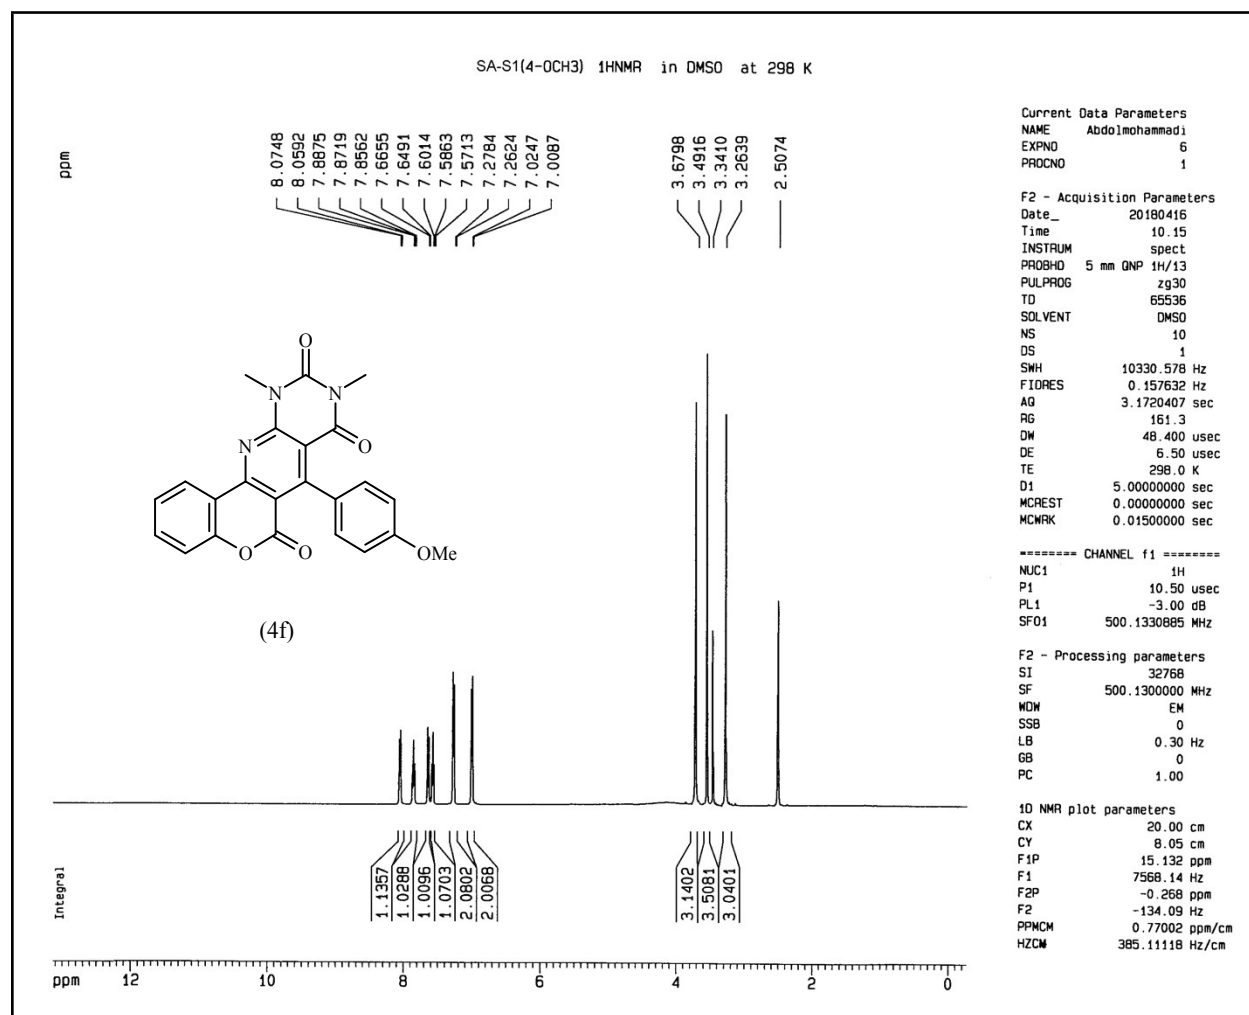

<sup>13</sup>C-NMR of 4f

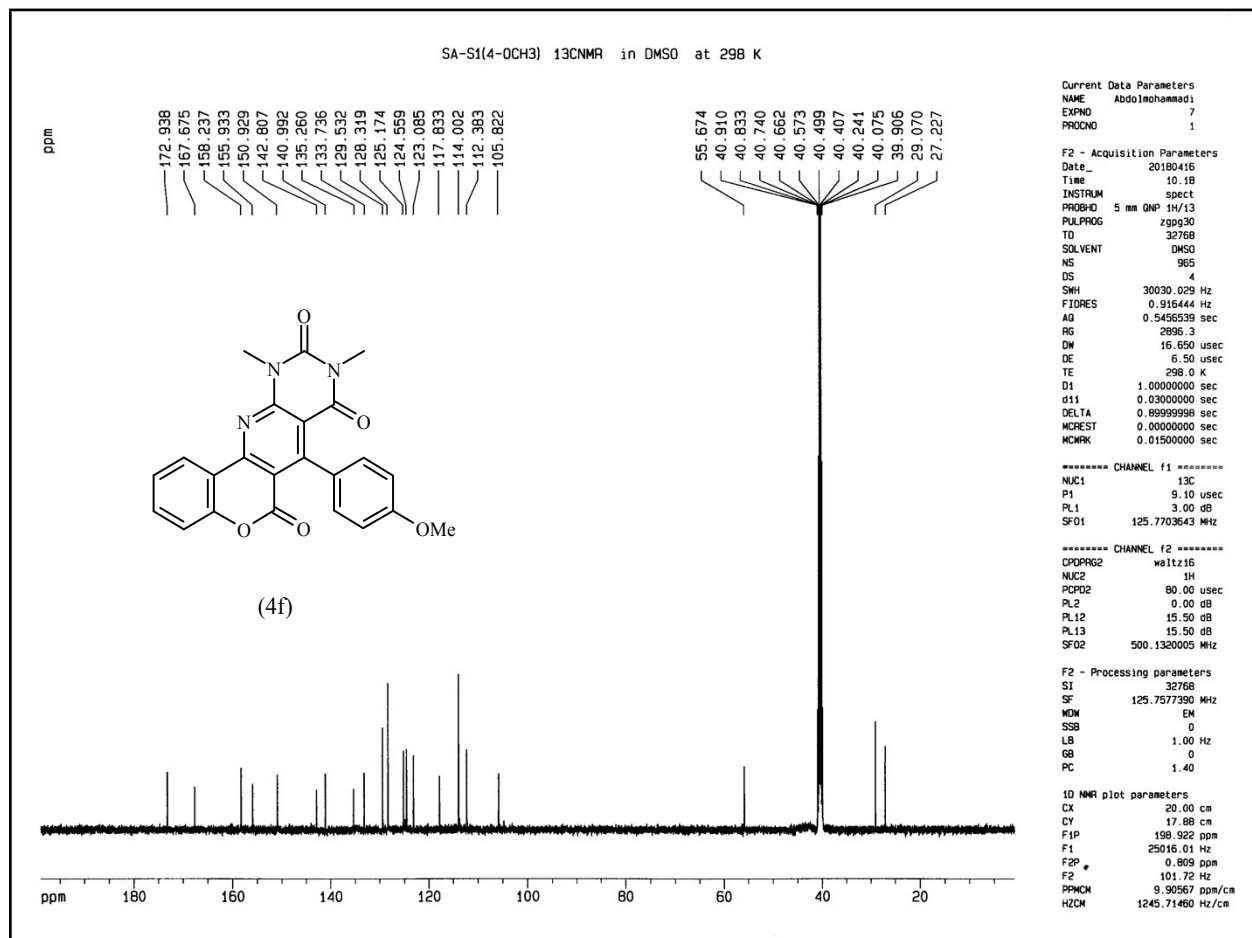

# IR of 4g

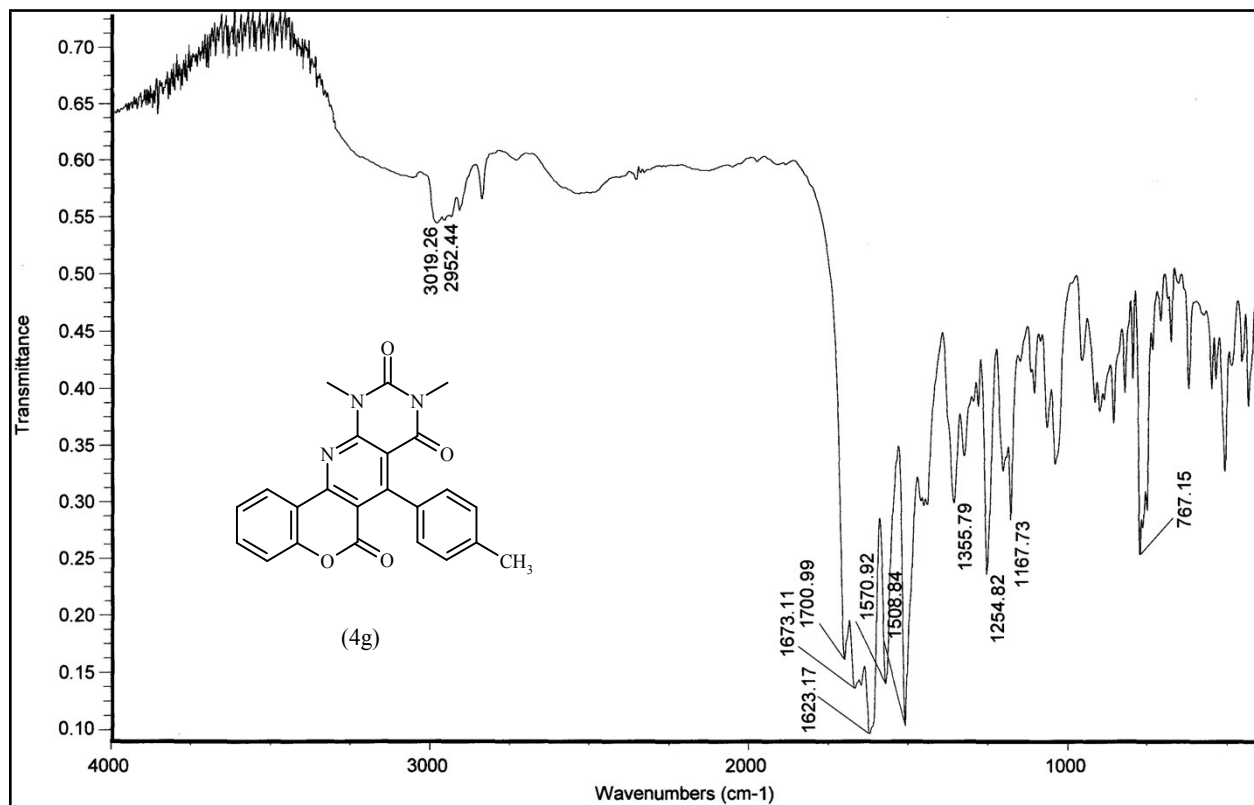

<sup>1</sup>H-NMR of 4g

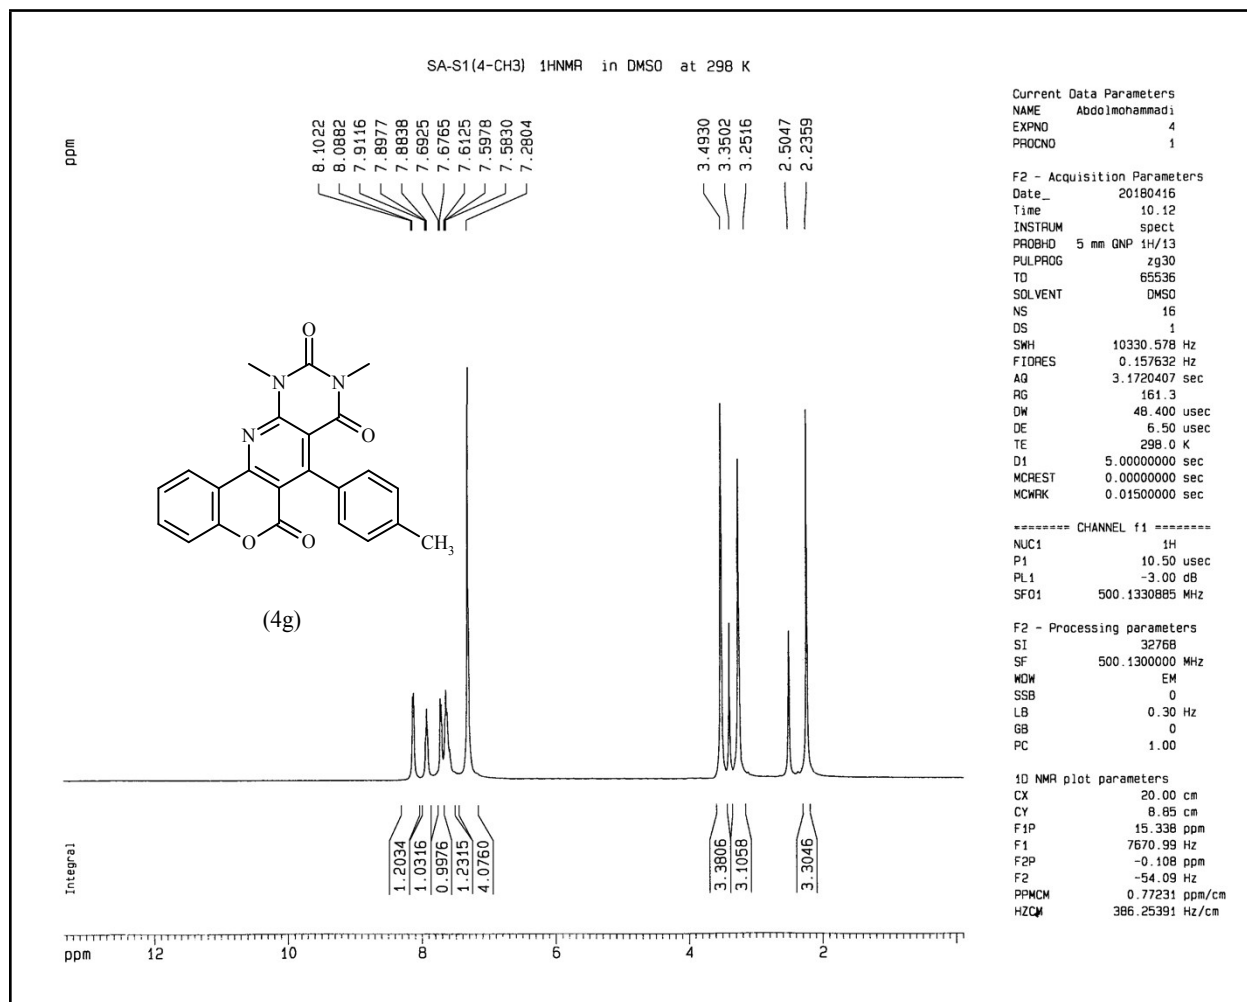

<sup>13</sup>C-NMR of 4g

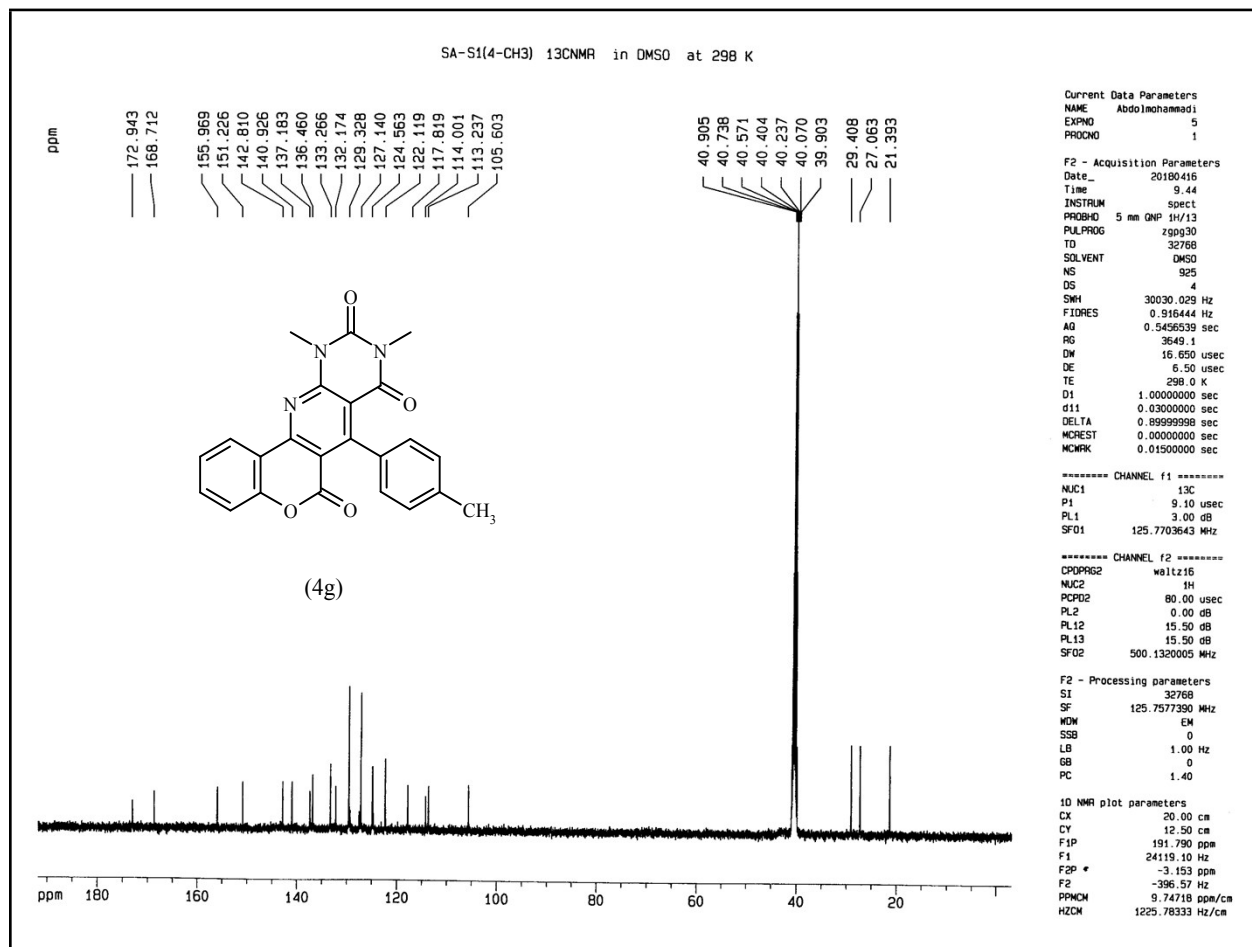

IR of 4h

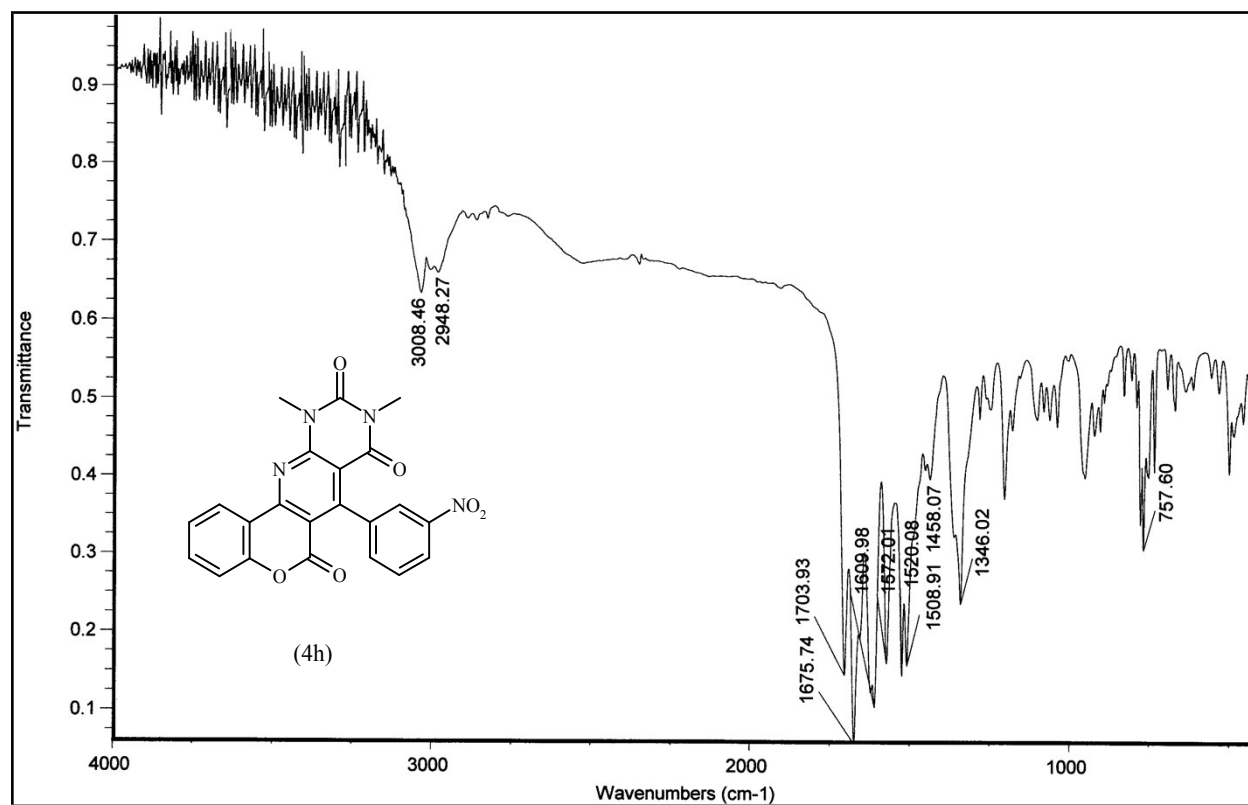

<sup>1</sup>H-NMR of 4h

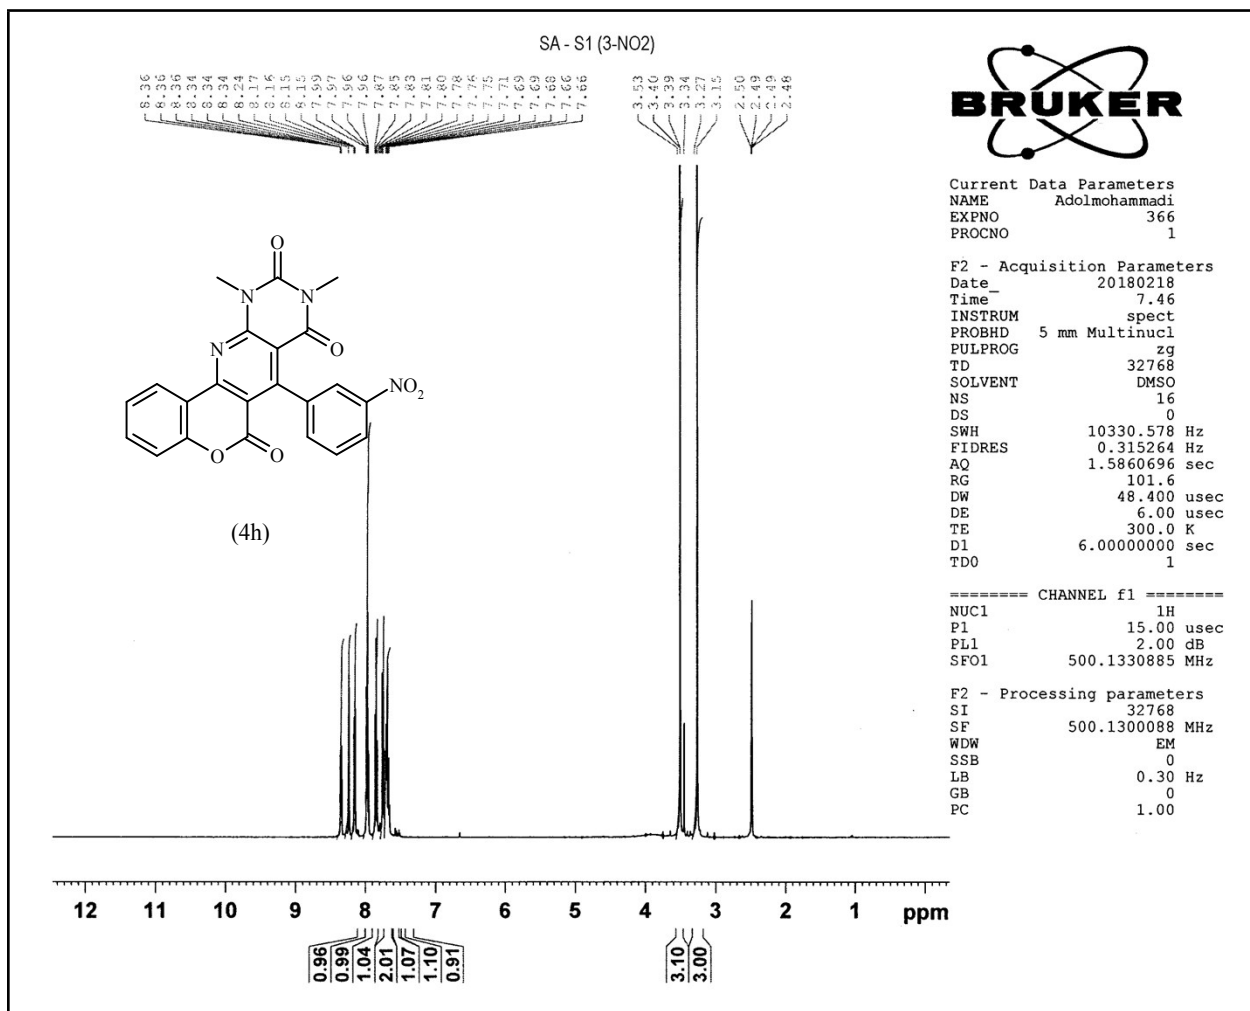

<sup>13</sup>C-NMR of 4h

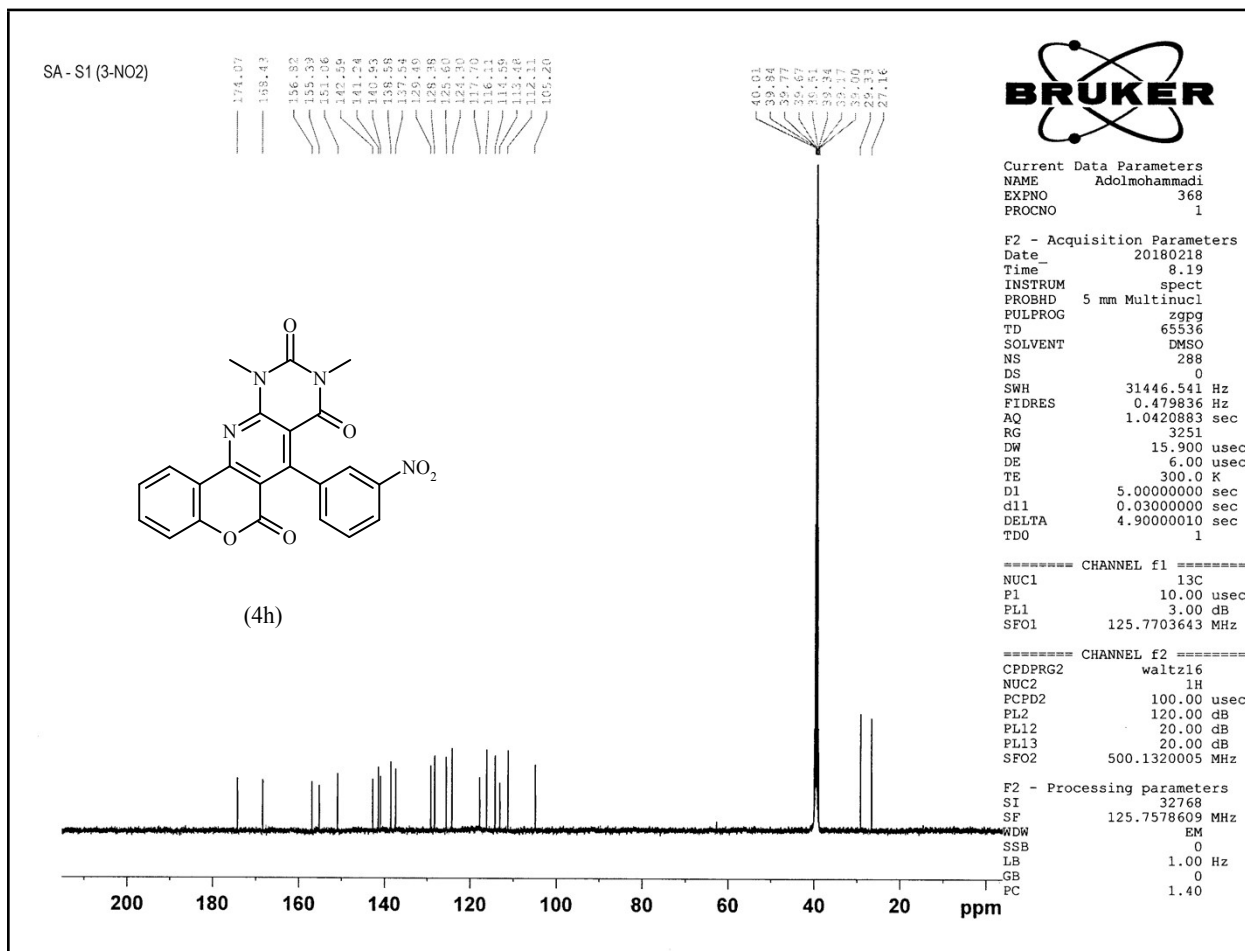

Supplement: d0ra01978j1.pdf [file d0ra01978j1.pdf]
